# 1 **Blue Light Negatively Regulates Tolerance to Phosphate**

## 2 **Deficiency in Arabidopsis**

3

4 Chuan-Ming Yeh<sup>1,2</sup>, Koichi Kobayashi<sup>3</sup>, Sho Fujii<sup>3</sup>, Hidehiro Fukaki<sup>4</sup>, Nobutaka Mitsuda<sup>2</sup>,  
5 Masaru Ohme-Takagi<sup>1,2\*</sup>

6

7 <sup>1</sup> Graduate School of Science and Engineering, Saitama University, Saitama 338-8570, Japan

8 <sup>2</sup> Bioproduction Research Institute, National Institute of Advanced Industrial Science and  
9 Technology (AIST), Tsukuba, Ibaraki 305-8562, Japan

10 <sup>3</sup> Graduate School of Arts and Sciences, The University of Tokyo, Tokyo 153-8902, Japan

11 <sup>4</sup> Graduate School of Sciences, Kobe University, Kobe 657-8501, Japan

12

13 \*Correspondence and material requests should be addressed to Masaru Ohme-Takagi.  
14 (mtakagi@mail.saitama-u.ac.jp)

15

## 16 **Abbreviations**

17 B, blue; DGDG, digalactosyldiacylglycerol; FR, far-red; hps, hypersensitive to phosphate  
18 starvation; HY5, ELONGATED HYPOCOTYL 5; LR, lateral root; MGD,  
19 monogalactosyldiacylglycerol; NPC4, novel phospholipase C; PC, phosphatidylcholine;  
20 PHL1, PHR1-like 1; PHO1, PHOSPHATE1; PHR1, PHOSPHATE STARVATION  
21 RESPONSE 1; Pi, inorganic phosphate; PR, primary root; PSI, phosphate starvation-induced;  
22 PSR, phosphate starvation response; R, red; slr-1, solitary-root-1; SQDG,  
23 sulfoquinovosyldiacylglycerol; TF, transcription factor; WT, wild type.

24

25

26 **Abstract**

27 Plants have evolved mechanisms to improve utilization efficiency or acquisition of inorganic  
28 phosphate (Pi) in response to Pi deficiency, such as altering root architecture, secreting acid  
29 phosphatases, and activating the expression of genes related to Pi uptake and recycling.  
30 Although many genes responsive to Pi starvation have been identified, transcription factors  
31 that affect tolerance to Pi deficiency have not been well characterized. We show here that  
32 defect in the *ELONGATED HYPOCOTYL 5 (HY5)* transcription factor gene results in  
33 tolerance to Pi deficiency in Arabidopsis. The primary root length of *hy5* was only slightly  
34 inhibited under Pi deficient condition and its fresh weight was significantly higher than that of  
35 wild type. The Pi deficiency-tolerant phenotype of *hy5* was similarly observed when grown  
36 on the medium without Pi. In addition, a double mutant, *hy5slr1*, without lateral roots also  
37 showed tolerance to phosphate deficiency, indicating that the tolerance of *hy5* does not result  
38 from increase of external Pi uptake and may be related to internal Pi utilization or recycling.  
39 Moreover, we found that blue light negatively regulates tolerance to Pi-deficiency and that  
40 *hy5* exhibits tolerance to Pi deficiency due to blockage of blue-light responses. Collectively,  
41 this study points out light quality may play an important role in the regulation of internal Pi  
42 recycling and utilization efficiency. Also, it may contribute to reducing Pi fertilizer  
43 requirements in plants through a proper illumination.

44

45 **Keywords**

46 HY5, light, phosphate deficiency, recycling, root architecture, transcription factor

47

48

49

50

51 **Introduction**

52 Inorganic phosphate (Pi) is an essential constituent of ATP, nucleic acids and membrane  
53 phospholipids. In addition, it is crucial to various cellular metabolic pathways, including  
54 photosynthesis, glycolysis, respiration, signal transduction and carbohydrate metabolism  
55 (Ticconi AND Abel 2004, Péret et al. 2011, Niu 2013). However, Pi is easily chelated by soil  
56 particles or formed insoluble complexes with aluminum or iron at acid pH and with calcium  
57 at alkaline pH leading to a low mobility and availability in soils (Wissuwa 2003, Gaxiola et al.  
58 2011). Therefore, available soil Pi concentrations are often less than the requirement for  
59 optimal crop production (Nussaume et al. 2011, Péret et al. 2011, Niu 2013). Plants have  
60 evolved adaptive mechanisms to acquire and recycle Pi in response to Pi deficiency.  
61 Alteration of root architecture, such as enhancement of lateral root growth and root hair  
62 formation, increases root surface areas for Pi absorption (Ticconi AND Abel 2004, Péret et al.  
63 2011). Induction of high-affinity Pi transporter genes increases uptake of soluble Pi, while  
64 activation or secretion of acid phosphatases, ribonucleases, and organic acids enhances  
65 scavenging of extracellular Pi from insoluble organic complexes. In addition, the activities of  
66 acid phosphatases and ribonucleases also help release Pi from intracellular organic  
67 Pi-containing molecules (Raghothama 2000, Poirier and Bucher 2002, Nussaume et al. 2011).  
68 To improve Pi use efficiency, plants substitute bypass pathways that do not require Pi for  
69 metabolic processes requiring Pi (Plaxton and Tran 2011). Replacing membrane  
70 phospholipids with non-P-containing glycolipids also plays an important role in the supply of  
71 free Pi during Pi deficiency (Kobayashi et al. 2006).

72 Many efforts have been made to unravel the molecular mechanisms that regulate Pi  
73 starvation responses (PSRs). An array of Pi starvation-induced (PSI) genes have been  
74 identified by transcriptome studies (Wu et al. 2003, Misson et al. 2005, Thibaud et al. 2010,  
75 Woo et al. 2012) and a series of *hypersensitive to phosphate starvation (hps)* mutants have

76 been isolated and characterized (Yeh et al. 2017). Although various plant transcription factors  
77 (TFs) affect PSRs, the transcriptional regulation of these processes is not yet well elucidated.  
78 *AtPHR1* (*PHOSPHATE STARVATION RESPONSE 1*) is the first Arabidopsis TF gene shown  
79 to mediate diverse PSRs (Rubio et al. 2001). Although *AtPHR1* is not Pi starvation-inducible,  
80 PHR1 regulates a subset of PSI genes through the miR399-PHO2 (an ubiquitin-conjugating  
81 E2 enzyme) signaling pathway (Bari et al. 2006, Chiou et al. 2006). *AtPHR1*, *AtPHL1*  
82 (*PHR1-like 1*), and their two rice orthologues, *OsPHR1* and *OsPHR2*, have been identified as  
83 having partially redundant functions (Zhou et al. 2008, Bustos et al. 2010, Liu et al. 2010). In  
84 addition, several TFs have been identified as negative regulators of PSRs in Arabidopsis.  
85 BHLH32, a basic helix-loop-helix TF, negatively regulates anthocyanin accumulation, root  
86 hair formation, and induction of the PSI genes (Chen et al. 2007). *AtMYB62* is  
87 low-Pi-inducible and mediates its negative effects on PSRs through modulation of gibberellin  
88 metabolism (Devaiah et al. 2009). WRKY6 and WRKY42 negatively regulate the expression  
89 of *PHOSPHATE1* (*PHO1*), which is responsible for Pi translocation from root to shoot in  
90 Arabidopsis (Hamburger et al. 2002, Chen et al. 2009). *AtWRKY75* and *AtZAT6* have been  
91 reported to regulate root development and Pi acquisition, although they may not be specific to  
92 PSRs due to their responsiveness to multiple nutrient deficiencies (Devaiah et al. 2007a and  
93 2007b). In recent years, several Arabidopsis TF genes, such as *AtERF070*, *APSRI*, *AtMYB2*  
94 and *AL6*, have been shown to be involved in the regulation of root growth and architecture  
95 under Pi deficiency (Yeh and Ohme-Takagi 2015).

96 Adding Pi fertilizer can improve soil Pi levels; however, the world's Pi rock reserves  
97 may be exhausted within 120 years (Gilbert 2009; Nussaume et al. 2011) and the demand for  
98 Pi fertilizers will likely increase to support crop productivity for the growing global  
99 population (Nussaume et al. 2011, Péret et al. 2011). In addition, the low solubility of Pi in  
100 soils often causes over-application of chemical fertilizers, subsequently, leading to potential

101 threats to the environment and the ecosystem (Gaxiola et al. 2011, Péret et al. 2011).  
102 Therefore, proper utilization of the remaining Pi reserves is important to reduce Pi resource  
103 depletion and environmental threaten. To this end, development of crops with tolerance to Pi  
104 deficiency is required, especially if crops can be manipulated to possess higher ability for Pi  
105 recycling or Pi utilization efficiency.

106 In this study, we identified a Pi deficiency-tolerant *hy5-215* mutant with defect in the  
107 Arabidopsis bZIP TF ELONGATED HYPOCOTYL 5 (HY5). Under Pi-deficient conditions,  
108 primary root length and seedling fresh weight were reduced to a lesser extent in the *hy5-215*  
109 mutant compared to the wild type (WT). The Pi-deficiency tolerance phenotype of *hy5-215*  
110 did not change in plants grown on medium without Pi, indicating that this tolerance may be  
111 related to an enhanced internal Pi utilization but not uptake of external Pi. Furthermore, we  
112 found that continuous blue light accelerate sensitivity to Pi deficiency in WT and elimination  
113 from blue light improve WT tolerance to Pi deficiency. Our results indicate that blue light  
114 plays a negative role in Pi deficiency tolerance and *hy5-215* exhibits tolerance to Pi deficiency  
115 probably due to blockage of blue-light responses.

116

117

118

119

120

121

122

123

124

125

## 126 **Results and Discussion**

### 127 **Tolerant phenotypes of *hy5-215* mutants under Pi deficiency**

128 To identify transcription factors (TFs) that can be manipulated to allow plants growing well  
129 under minimal Pi fertilization, we grew Arabidopsis mutants in Pi-deficient conditions and  
130 screened for plant phenotypes indicative of tolerance to Pi deficiency: larger plant size, longer  
131 primary root (PR) length, and lower anthocyanin accumulation than wild type (WT). The  
132 *hy5-215* mutant with a defect in *HY5*, which encodes a bZIP TF that functions in  
133 photomorphogenesis, exhibited a Pi deficiency-tolerant phenotype. The PR lengths of WT  
134 were significantly reduced under Pi-deficient conditions (10  $\mu$ M Pi) when compared with  
135 those grown under Pi-sufficient conditions (625  $\mu$ M Pi) while only slight inhibition of PR  
136 growth was observed in the *hy5-215* mutant between Pi-sufficient and Pi-deficient conditions  
137 (Fig. 1A, B). WT fresh weight declined to 37% under Pi deficient-conditions compared to  
138 Pi-sufficient conditions while *hy5-215* fresh weight declined to 65% under Pi  
139 deficient-conditions compared to Pi-sufficient conditions (Fig. 1C and Supplementary Fig.  
140 S1). We also confirmed the tolerance of *hy5-215* to Pi deficiency by examination of several  
141 well-known PSRs including expression of ribonuclease, purple acid phosphatase and  
142 anthocyanin biosynthesis genes (Supplementary Note 1 and Supplementary Fig. S2-4).

143

### 144 **Alteration of root architecture in *hy5-215* is not responsible to Pi-deficiency tolerance**

145 Plant root architecture, the spatial arrangement of a root system, is highly plastic in  
146 response to depletion of mineral nutrients. Modifications of RA through altering the number,  
147 length, angle and diameter of roots or root hairs enable plants to cope with nutrient shortages  
148 (Gruber et al. 2013). The “topsoil foraging” strategy is employed to get immobile Pi from the  
149 Pi-enriched upper-layer soil under Pi deficiency; in topsoil foraging, plants inhibit PR growth  
150 but enhance lateral root (LR) growth and root hair formation, thus increasing the surface area

151 available for Pi uptake (Péret et al. 2011, Sato and Miura 2011, Niu 2013). In this study, a  
152 great number of root hairs were initiated in the WT under Pi-deficient conditions, whereas  
153 *hy5-215* formed fewer and shorter root hairs (Fig. 2A), suggesting that *hy5-215* may not show  
154 as strong of a response to Pi deficiency as WT. However, LR numbers and lengths were not  
155 enhanced by low-Pi treatment in both WT and *hy5-215*. Instead, LR growth was repressed by  
156 our Pi deficiency condition (Fig. 2B-D). This inconsistency may result from different Pi  
157 concentrations and experimental conditions used in the different studies. Plants grown at  
158 relatively higher levels of Pi (> 1 mM) in Pi-sufficient media form fewer or almost no LRs  
159 (Pérez-Torres et al. 2008, Lei et al. 2011). However, Pi-sufficient treatment (625  $\mu$ M) in this  
160 work induces much more LR formation and growth. This is in agreement with some previous  
161 reports that use relative lower concentrations for Pi-sufficient treatments (Devaiah et al. 2007a,  
162 Pérez-Torres et al. 2008, Devaiah et al. 2009, Lei et al. 2011, Gruber et al. 2013).

163 Although LR growth was not enhanced by Pi starvation in this study, a root system  
164 possessing more and longer LRs was found in *hy5-215* in both Pi-sufficient and Pi-deficient  
165 conditions (Fig. 2B-D). To examine whether the increased LR number and lengths contribute  
166 to the Pi-deficiency tolerance in *hy5-215*, a double mutant constructed with *hy5-215* and  
167 *solitary-root-1 (slr-1)*, a gain-of-function mutant of IAA14 (a repressor of auxin signaling)  
168 that produces no LRs, was examined under Pi deficiency (Fukaki et al. 2002; Kobayashi et al.  
169 2012). The *hy5-215 slr-1* double mutant showed a long-hypocotyl phenotype similar to that of  
170 *hy5-215* and a PR lacking LR growth similar to the *slr-1* phenotype (Fig. 2E). Interestingly,  
171 the PR elongation of *hy5-215 slr-1* seedlings was only slightly inhibited by Pi deficiency,  
172 although the PR of *hy5-215 slr-1* was shorter than that of *hy5-215* in the respective conditions.  
173 The results revealed that LR growth is beneficial for growth on Pi-deficient medium, but the  
174 change in *hy5-215* root architecture does not appear to be responsible for the observed  
175 tolerance to Pi deficiency in *hy5-215*. Auxin signaling was reported to be enhanced in

176 *Arabidopsis hy5* mutants (Oyama et al. 1997, Cluis et al. 2004), whereas it may be repressed  
177 in *hy5-215 slr-1* mutants due to the gain-of-function mutation of *SLR/IAA14*. Therefore, the  
178 similar tolerance phenotypes between *hy5-215 slr-1* and *hy5-215* also suggest that auxin  
179 signaling may not be responsible for the Pi-deficiency tolerance in *hy5-215*.

180

### 181 **External Pi acquisition is not involved in Pi-deficiency tolerance of *hy5-215***

182 Enhancement of Pi influx through induction of high-affinity Pi transporter genes is one of  
183 the conserved strategies evolved by plants to optimize their growth in response to Pi  
184 limitation. There are nine genes encoding *PHT* homologs (*PHT1;1–PHT1;9*) in the  
185 *Arabidopsis* genome. Most of the *PHT1* family genes are strongly induced by low Pi  
186 treatment within the first 12 hours (Bayle et al. 2011, Nussaume et al. 2011). Functional  
187 studies show a major role for *PHT1* in Pi acquisition in roots from Pi-deficient environment;  
188 however, some of the *PHTs* are also required for Pi mobilization (*PHT1;5*), flower  
189 development (*PHT1;6*) and Pi uptake in Pi replete condition (*PHT1;1* and *PHT1;4*)  
190 (Nussaume et al. 2011, Nagarajan et al. 2011). In this study, we found that expression of  
191 *PHT1* genes was lower in *hy5-215* shoots than in the WT, suggesting *hy5-215* may not be as  
192 deficient as WT under low Pi treatment (Supplementary Fig. S5). However, several *PHT1*  
193 genes were induced in a higher level in *hy5-215* roots under both sufficient and deficient  
194 conditions (Supplementary Table S1). To demonstrate whether the higher *PHT1* gene  
195 expression in *hy5-215* roots can increase Pi uptake and subsequently contributes to  
196 Pi-deficiency tolerance, the free Pi content were measured. A great reduction of Pi level was  
197 found in *hy5-215* shoots under Pi sufficient condition, although Pi content was slightly higher  
198 in *hy5-215* shoots than in WT shoots under Pi deficiency (Fig. 3A). There was no significant  
199 difference between WT and *hy5-215* in roots (Fig. 3B). The results indicated that the elevated  
200 amounts of *PHT1* transcripts in *hy5-215* roots might not or only partially contribute to Pi



201 deficiency tolerance of *hy5-215*. To verify this finding, we cultured WT and *hy5-215* plants on  
202 Pi-free media. The *hy5-215* plants exhibited similar growth on Pi-free medium and on  
203 Pi-deficient medium containing 10  $\mu$ M Pi. The PR length of *hy5-215* grown on Pi-free  
204 medium was only slightly diminished compared to that of plants grown on Pi-deficient  
205 medium (Fig. 3C). Altogether, these results indicated that the tolerance of *hy5-215* to Pi  
206 deficiency was not related to extracellular Pi acquisition. Furthermore, it also suggested the  
207 pre-accumulated Pi in seeds during seed development is sufficient to support *hy5-215* growth  
208 at the early stages of Pi deficiency.

209

#### 210 **Lower level of Pi deficiency-inducible membrane glycolipids in *hy5-215***

211 Since Pi deficiency tolerance of *hy5-215* was not due to Pi acquisition, we investigated Pi  
212 use efficiency in the mutant and wild type. Improvement of Pi utilization efficiency helps  
213 plants to conserve internal Pi and can involve the recycling of Pi from senescent tissues and  
214 the replacement of Pi from cellular structures or metabolic processes by alternative non-Pi  
215 compounds (Kobayashi et al. 2006, Rose et al. 2013). Membrane lipid remodeling, in which  
216 phospholipids are hydrolyzed and replaced by non-phosphorus glycolipids, such as  
217 sulfoquinovosyldiacylglycerol (SQDG) and digalactosyldiacylglycerol (DGDG), is a  
218 representative mechanism of Pi recycling, which improves Pi use efficiency (Kobayashi et al.  
219 2006, Nakamura et al. 2013). Therefore, we analyzed the expression of genes involved in  
220 hydrolysis of phospholipids, novel phospholipase C gene (*NPC4*), and synthesis of SQDG  
221 and DGDG including *SQD1*, *SQD2*, *MGD2* and *MGD3* (monogalactosyldiacylglycerol  
222 synthetic genes) in the WT and *hy5-215*. All the analyzed genes were induced by Pi deficiency,  
223 but the expression levels were lower in *hy5-215* than in the WT (Supplementary Fig. S6A-E).  
224 The lipid composition calculated as the ratio of DGDG and PC (phosphatidylcholine), one of  
225 the major membrane phospholipids, is used as a marker to indicate a Pi-deficient state

226 (Kobayashi et al. 2006). Enhancement of the DGDG/PC ratio represents an increase in  
227 DGDG biosynthesis to replace membrane phospholipids in response to Pi deficiency. A lower  
228 ratio of DGDG/PC was found in *hy5-215* under Pi-deficient conditions (Supplementary Fig.  
229 S6F), indicating that the increased tolerance to Pi deficiency in *hy5-215* mutants is not caused  
230 by increased free Pi from phospholipids.

231

### 232 **Identification of possible candidate genes responsible for Pi-deficiency tolerance in** 233 ***hy5-215***

234 To determine the Pi-deficiency tolerance mechanism of *hy5-215*, we performed a  
235 transcriptome study using microarray. Consistent with previous reports, the well-known PSI  
236 genes were up-regulated in the WT under Pi deficiency. However, the expression levels of  
237 most PSI genes were significantly lower in *hy5-215*, including genes encoding high-affinity Pi  
238 transporters, ribonucleases, acid phosphatases, lipid remodeling and anthocyanin synthesis  
239 enzymes (Supplementary Table S1). Previously reported Pi deficiency-responsive TF genes in  
240 Arabidopsis mainly belong to the MYB and WRKY families (Rubio et al. 2001, Bustos et al.  
241 2010, Yeh and Ohme-Takagi 2015). In this study, various TF genes, including *MYB*, *WRKY*,  
242 *AP2/ERF*, *bHLH*, *C2H2ZnF* and *MADS-box*, were up-regulated or down-regulated in *hy5-215*  
243 under Pi-deficient conditions (Supplementary Table S2), suggesting possible roles in the  
244 tolerance of *hy5-215* to Pi deficiency.

245 Liu et al. (2017) recently reported that HY5 negatively regulates expression of *PHR1* and  
246 its downstream PSI genes, and *hy5* mutant increases Pi and anthocyanin contents. According  
247 to their results, the longer root phenotype of *hy5* to phosphate starvation may result from the  
248 increased PSRs and Pi content. Although the root phenotypes of *hy5* are similar to our results,  
249 the expression of *PHR1* and PSI genes, and Pi and anthocyanin content were lower in the  
250 *hy5-215* mutant in our study (Fig. 3, Supplementary Fig. S2, S3, Table S1), which are

251 consistent with previous reports that the expression of anthocyanin biosynthesis genes and  
252 anthocyanin accumulation are reduced in *hy5* (Lee et al. 2007, Jeong et al. 2010, Shin et al.  
253 2013). Our results clearly show that the *hy5* tolerant phenotype to phosphate starvation is  
254 unlikely to be related to external Pi uptake because of similar growths of *hy5* on Pi-deficient  
255 and Pi-free conditions (Fig. 3C). Further information is required to address whether these  
256 inconsistencies result from different growth conditions and different plant tissues.

257 Unexpectedly, a significant number of photosynthesis-related and chlorophyll synthesis  
258 genes were down-regulated in roots but not shoots of *hy5-215* (Supplementary Fig. S7 and  
259 Table S3). Plant roots can accumulate chlorophyll and turn green under light illumination. The  
260 green roots are supposed to have photosynthetic ability as green leaves (Kobayashi et al.  
261 2012). We therefore analyzed whether the Pi-deficiency tolerance of *hy5-215* is related to  
262 down-regulation of photosynthesis-related and chlorophyll synthesis genes, which may induce  
263 lower Pi consumption by decreasing photosynthesis in *hy5-215* roots. *GLK1* and *GLK2* have  
264 been shown to regulate expression of various photosynthetic genes in Arabidopsis roots  
265 (Kobayashi et al. 2012, Kobayashi et al. 2013). In addition, it was reported the roots of  
266 *35S:GLK1* accumulates much chlorophyll and are hypersensitive to Pi deficiency (Kang et al.  
267 2014). We thus examined whether the *glk* mutants also show tolerance to Pi deficiency. The  
268 similar PR lengths between WT and *glk* mutants indicate *GLK1* and *GLK2* may not be  
269 involved in Pi-deficiency tolerance (Supplementary Fig. S8A, C). We further investigated the  
270 overexpression lines of *GLK1* and *GLK2* in *hy5-215* background (*35S:GLK1 hy5-215* and  
271 *35S:GLK2 hy5-215*), which have a recovered chlorophyll content as WT (Kobayashi et al.  
272 2012). The *35S:GLK1 hy5-215* and *35S:GLK2 hy5-215* plants exhibited longer PR lengths  
273 under Pi deficiency similar to *hy5-215* (Supplementary Fig. S8B), suggesting that tolerance of  
274 *hy5-215* to Pi deficiency may not be related to chlorophyll content and photosynthetic  
275 activity.

276 To confirm this finding, the photosynthetic ability of *hy5-215* and WT plants was  
277 measured and compared, although photosynthetic gene expression in shoots was not  
278 significantly different between *hy5-215* and WT under Pi-sufficient or Pi-deficient conditions.  
279 As shown in Supplementary Fig. S9, the maximum quantum yield of photosystem II (Fv/Fm)  
280 and the actual quantum yield of photosystem II under light (YII) were reduced in the  
281 cotyledons of both WT and *hy5-215* in response to Pi deficiency. Although the measurement  
282 of Fv/Fm and YII of *hy5-215* under Pi sufficient treatment were lower than those of WT, there  
283 was no significant difference between WT and *hy5-215* in response to Pi depletion. In  
284 addition, Fv/Fm and YII in the true leaves of WT and *hy5-215* were not affected by our low Pi  
285 treatment. These data indicate that the tolerance of *hy5-215* to Pi deficiency is not related to  
286 photosynthetic ability (Supplementary Fig. S9). All together, these results indicate a novel  
287 mechanism other than the well-known PSRs may account for *hy5-215* tolerance to Pi  
288 deficiency.

289

### 290 **Light quality is involved in regulation of Pi deficiency response**

291 Because HY5 acts as an integrator of different light signaling pathways downstream of  
292 multiple photoreceptor families and regulates photomorphogenesis (Cluis et al. 2004), we  
293 examined the effect of light on *hy5-215* tolerance to Pi deficiency. When the seedlings were  
294 grown in Pi-deficient conditions under continuous white light, WT and *hy5-215* PR lengths  
295 were 28% and 46% of PR lengths under Pi-sufficient conditions, respectively (Fig. 4A).  
296 Under continuous dark, there were no significant differences in PR growth between WT and  
297 *hy5-215* (Fig. 4B). These results, together with the results from long-day treatments (16 h  
298 light/8 h dark; Fig. 1B), indicate that increased light irradiation time inhibits Arabidopsis PR  
299 growth in Pi-deficient conditions. Therefore, light may play a role in *hy5-215* tolerance to Pi  
300 deficiency.

301 To better understand light effects on Pi-deficiency tolerance, Arabidopsis plants were  
302 grown under continuous blue (B), red (R) and far-red (FR) light. PR growth was inhibited by  
303 Pi deficiency in the WT under continuous B light to a similar extent as was observed in white  
304 light. In contrast, the same level of inhibition by Pi deficiency under B light was not observed  
305 in *hy5-215* (Fig. 5A). Interestingly, PR growth was not inhibited by Pi deficiency in both WT  
306 and *hy5-215* when grown under continuous R and FR irradiation (Fig. 5B-D and  
307 Supplementary Fig. S10). These results indicate that the tolerance of *hy5-215* to Pi deficiency  
308 is negatively regulated by B light and is not related to R and FR light. To further confirm this  
309 finding, the B light receptor mutants, *cry1 cry2* and *phot1 phot2*, were examined under Pi  
310 deficiency. Indeed, a tolerant phenotype to Pi deficiency was found in these two mutants (Fig.  
311 5E-F). Therefore, the tolerance of *hy5-215* to Pi deficiency likely results from blockage of B  
312 light responses, and the tolerance mechanism may be related to enhancement of internal Pi  
313 recycling or utilization efficiency but not external Pi acquisition due to the tolerant phenotype  
314 of *hy5-215* under Pi-free condition. Our findings may provide valuable insights for  
315 developing Pi deficiency-tolerant crops in the future. Furthermore, light quality-regulated  
316 responses to Pi deficiency may allow indoor plant growers to reduce Pi fertilizer application  
317 through proper illumination.

318

319

320

321

322

323

324

325

## 326 **Materials and Methods**

### 327 **Plant materials and growth conditions**

328 The surface-sterilized seeds of *Arabidopsis thaliana* wild type [ecotypes Columbia  
329 (Col-0)] and mutants (*hy5-215*, *slr-1*, *hy5-215 slr-1*, *glk1*, *glk2*, *glk1 glk2*, *cry1 cry2*, *phot1*  
330 *phot2*), and transformants (*35S:GLK1 hy5-215* and *35S:GLK2 hy5-215*) were sown on 1/2  
331 Murashige and Skoog (MS) agar plates containing 625  $\mu\text{M}$   $\text{KH}_2\text{PO}_4$  (Pi sufficient) or 10  $\mu\text{M}$   
332  $\text{KH}_2\text{PO}_4$  (Pi deficient). Each experiment used 10 plants and was replicated three to four times.  
333 The seedlings were grown at 22°C and illuminated with 100-125  $\mu\text{mol m}^{-2} \text{s}^{-1}$  white light for  
334 16 hours per day or with blue (B), red (R) and far-red (FR) light for 24 hours. For  
335 determination of primary root (PR) length and fresh weight, the seedlings were cultured on  
336 vertical and horizontal plates for 10 and 14 days, respectively. The seedlings were then  
337 collected for photographs, measurement of PR length and fresh weight, and further  
338 experiments.

339

### 340 **Quantification of anthocyanin content**

341 The shoots of 10-day-old seedlings were frozen in liquid nitrogen, ground into a powder,  
342 and then re-suspended in an extraction buffer containing 45% methanol and 5% acetic acid.  
343 The supernatant was taken after centrifugation at 12,000 rpm for 10 minutes. Anthocyanin  
344 content was calculated by the absorbance at 530 and 637 nm as described previously (Matsui  
345 et al. 2004).

346

### 347 **Determination of acid phosphatase activity**

348 The histochemical staining of acid phosphatase activity was performed according to the  
349 method described by Yu et al. (2012) with some modifications. The roots of 10-day-old  
350 seedlings were overlaid with a 0.1% agar solution containing 0.01%

351 5-bromo-4-chloro-3-indolyl phosphate (BCIP). The acid phosphatase activity indicated by  
352 blue color on the root surface was observed and photographed after 6 to 24 hours.

353

#### 354 **Determination of lipid composition**

355 Seedlings were grown on 1/2 MS medium with 625  $\mu$ M Pi for 10 days and then  
356 transferred to 1/2 MS medium with 625  $\mu$ M Pi or 10  $\mu$ M Pi for 10 days. Samples were  
357 collected and immediately frozen in liquid nitrogen. Lipids were then extracted and analyzed  
358 by the method described by Kobayashi et al. (2006).

359

#### 360 **RNA isolation, reverse-transcription quantitative PCR (RT-qPCR), and microarray** 361 **analyses**

362 Total RNA was extracted by using the RNeasy Plant Mini kit (QIAGEN, Hilden,  
363 Germany) following the manufacturer's instructions. One  $\mu$ g of total RNA was subjected to  
364 first-strand cDNA synthesis using the PrimeScript RT reagent kit (Takara). Quantitative  
365 RT-qPCR was performed by the SYBR green method using the ABI7300 real-time PCR  
366 system (Applied Biosystems) as described previously (Mitsuda et al. 2005). The *UBQ1* gene  
367 was used as an internal control. The microarray experiments and the data analysis were  
368 conducted by the method described by Mitsuda et al. (2005). Three or four biological  
369 replicates were included in each experiment.

370

#### 371 **Measurement of photosynthetic activity**

372 The maximum quantum yield of photosystem II ( $F_v/F_m$ ) and actual quantum yield of  
373 photosystem II in light ( $Y_{II}$ ) of cotyledons and true leaves were measured according to the  
374 method described by Kobayashi et al. (2013).

375

## 376 **Statistical analysis**

377 All the experiments were performed in a completely randomized design. Data on root  
378 length (cm) and seedling fresh weight (mg) were recorded after growth for 10 and 14 days,  
379 respectively. Analysis of variance (ANOVA) and mean comparisons using least significant  
380 difference (LSD) tests were conducted. Data represent means of three or four independent  
381 experiments. Different letters above bars indicate statistically significant differences ( $P$   
382  $<0.05$ ).

383

## 384 **Accession numbers**

385 Arabidopsis Genome Initiative numbers described in this article are as follows: *ACP5*  
386 (At3g17790), *CHS* (At5g13930), *DFR* (At5g42800), *GLK1* (At2g20570), *GLK2* (At5g44190),  
387 *HY5* (At5g11260), *LDOX* (At4g22880), *MGD2* (At5g20410), *MGD3* (At2g11810), *MYB75*  
388 (At1g56650), *MYB90* (At1g66390), *NPC4* (At3g03530), *PHT1;2* (At5g43370), *PHT1;3*  
389 (At5g43360), *PHT1;4* (At2g38940), *PHT1;5* (At2g32830), *PHT1;7* (At3g54700), *PHT1;8*  
390 (At1g20860), *PHT1;9* (At1g76430), *RNS1* (At2g02990), *SLR/IAA14* (At4g14550), *SQD1*  
391 (At4g33030), *SQD2* (At5g01220) and *UF3GT* (AT5G54060).

392

## 393 **Funding**

394 This work was supported by grants from The Japan Society for the Promotion of Science  
395 (JSPS) and The Japan Science and Technology Agency (JST).

396

## 397 **Disclosures**

398 The authors declare no competing financial interests.

399

## 400 **Acknowledgements**



401 We thank Professor Kiyotaka Okada (National Institute for Basic Biology, Japan) for  
402 providing *hy5-215* seeds, Professor Shigo Takagi (Osaka University, Japan) and Professor  
403 Hirokazu Tsukaya (The University of Tokyo, Japan) for *phot1*, *phot2* and *phot1 phot2* seeds,  
404 Professor Christian Fankhauser (University of Lausanne, Switzerland) for *cry1 cry2* seeds and  
405 Dr. Yukari Nagatoshi (JIRCAS, Japan) for *glk1*, *glk2* and *glk1 glk2* seeds. We also thank Dr.  
406 Sumire Fujiwara and Dr. Yukari Nagatoshi for discussion on the research, and Naomi Ujii,  
407 Machiko Onuki, Yukie Kimura and Sumiko Takahash for technical assistance. This work was  
408 supported by grants from The Japan Society for the Promotion of Science (JSPS) and The  
409 Japan Science and Technology Agency (JST).

410

411

412

413

414

415

416

417

418

419

420

421

422

423

424

425

426 **References**

- 427 Bari R., Datt Pant B., Stitt M., Scheible W.R. (2006) PHO2, microRNA399, and PHR1 define  
428 a phosphate-signaling pathway in plants. *Plant Physiol.* 141: 988-999.
- 429 Bayle V., Arrighi J.F., Creff A., Nespoulous C., Vialaret J., Rossignol M. et al. (2011)  
430 *Arabidopsis thaliana* high-affinity phosphate transporters exhibit multiple levels of  
431 posttranslational regulation. *Plant Cell* 23: 1523-1535.
- 432 Bustos R., Castrillo G., Linhares F., Puga M.I., Rubio V., Pérez-Pérez J. et al. (2010) A central  
433 regulatory system largely controls transcriptional activation and repression responses to  
434 phosphate starvation in *Arabidopsis*. *PLoS Genet.* 6: e1001102.
- 435 Chen Z.H., Nimmo G.A., Jenkins G.I., Nimmo H.G. (2007) BHLH32 modulates several  
436 biochemical and morphological processes that respond to Pi starvation in *Arabidopsis*.  
437 *Biochem. J.* 405: 191-198.
- 438 Chen Y.F., Li L.Q., Xu Q., Kong Y.H., Wang H., Wu W.H. (2009) The WRKY6 transcription  
439 factor modulates *PHOSPHATE1* expression in response to low Pi stress in *Arabidopsis*.  
440 *Plant Cell* 21: 3554-3566.
- 441 Chiou T.J., Aung K., Lin S.I., Wu C.C., Chiang S.F., Su C.L. (2006) Regulation of phosphate  
442 homeostasis by microRNA in *Arabidopsis*. *Plant Cell* 18: 412-421.
- 443 Cluis C.P., Mouchel, C.F., Hardtke C.S. (2004) The *Arabidopsis* transcription factor HY5  
444 integrates light and hormone signaling pathways. *Plant J.* 38: 332-347.
- 445 Devaiah B.N., Karthikeyan A.S., Raghothama K.G. (2007a) WRKY75 transcription factor is a  
446 modulator of phosphate acquisition and root development in *Arabidopsis*. *Plant Physiol.*  
447 143: 1789-1801.
- 448 Devaiah B.N., Nagarajan V.K., Raghothama K.G. (2007b) Phosphate homeostasis and root  
449 development in *Arabidopsis* are synchronized by the zinc finger transcription factor ZAT6.  
450 *Plant Physiol.* 145: 147-159.

- 451 Devaiah B.N., Madhuvanthi R., Karthikeyan A.S., Raghothama K.G. (2009) Phosphate  
452 starvation responses and gibberellic acid biosynthesis are regulated by the *MYB62*  
453 transcription factor in *Arabidopsis*. *Mol. Plant* 2: 43-58.
- 454 Fukaki H., Tameda S., Masuda H., Tasaka M. (2002) Lateral root formation is blocked by a  
455 gain-of-function mutation in the *SOLITARY-ROOT/IAA14* gene of *Arabidopsis*. *Plant J.* 29:  
456 153-168.
- 457 Gaxiola R.A., Edwards M., Elser J.J. (2011) A transgenic approach to enhance phosphorus use  
458 efficiency in crops as part of a comprehensive strategy for sustainable agriculture.  
459 *Chemosphere* 84: 840-845.
- 460 Gilbert N. (2009) Environment: The disappearing nutrient. *Nature* 461: 716-718.
- 461 Gruber B.D., Giehl R.F., Friedel S., von Wirén N. (2013) Plasticity of the *Arabidopsis* root  
462 system under nutrient deficiencies. *Plant Physiol.* 163: 161-179.
- 463 Hamburger D., Rezzonico E., MacDonald-Comber Petétot J., Somerville C., Poirier Y. (2002)  
464 Identification and characterization of the *Arabidopsis PHO1* gene involved in phosphate  
465 loading to the xylem. *Plant Cell.* 14: 889-902.
- 466 Jeong S.W., Das P.K., Jeoung S.C., Song J.Y., Lee H.K., Kim Y.K. et al. (2010) Ethylene  
467 suppression of sugar-induced anthocyanin pigmentation in *Arabidopsis*. *Plant Physiol.* 154:  
468 1514-1531.
- 469 Kang J., Yu H., Tian C., Zhou W., Li C., Jiao Y. et al. (2014) Suppression of photosynthetic  
470 gene expression in roots is required for sustained root growth under phosphate deficiency.  
471 *Plant Physiol.* 165: 1156-1170.
- 472 Kobayashi K., Masuda T., Takamiya K., Ohta H. (2006) Membrane lipid alteration during  
473 phosphate starvation is regulated by phosphate signaling and auxin/cytokinin cross-talk.  
474 *Plant J.* 47: 238-248.
- 475 Kobayashi K., Baba S., Obayashi T., Sato M., Toyooka K., Keränen M. et al. (2012)

- 476 Regulation of root greening by light and auxin/cytokinin signaling in Arabidopsis. *Plant*  
477 *Cell* 24: 1081-1095.
- 478 Kobayashi K., Sasaki D., Noguchi K., Fujinuma D., Komatsu H., Kobayashi M. et al. (2013)  
479 Photosynthesis of root chloroplasts developed in Arabidopsis lines overexpressing  
480 *GOLDEN2-LIKE* transcription factors. *Plant Cell Physiol.* 54: 1365-1377.
- 481 Lee J., He K., Stolc V., Lee H., Figueroa P., Gao Y. et al. (2007) Analysis of transcription  
482 factor HY5 genomic binding sites revealed its hierarchical role in light regulation of  
483 development. *Plant Cell* 19: 731-749.
- 484 Lei M., Liu Y., Zhang B., Zhao Y., Wang X., Zhou Y. (2011) Genetic and genomic evidence  
485 that sucrose is a global regulator of plant responses to phosphate starvation in Arabidopsis.  
486 *Plant Physiol.* 156: 1116-1130.
- 487 Liu F., Wang Z., Ren H., Shen C., Li Y., Ling H.Q. et al. (2010) OsSPX1 suppresses the  
488 function of OsPHR2 in the regulation of expression of *OsPT2* and phosphate homeostasis  
489 in shoots of rice. *Plant J.* 62: 508-517.
- 490 Liu Y., Xie Y., Wang H., Ma X., Yao W., Wang H. (2017) Light and Ethylene Coordinately  
491 Regulate the Phosphate Starvation Response through Transcriptional Regulation of  
492 *PHOSPHATE STARVATION RESPONSE1*. *Plant Cell* 29: 2269-2284.
- 493 Matsui K., Tanaka H., Ohme-Takagi M. (2004) Suppression of the biosynthesis of  
494 proanthocyanidin in Arabidopsis by a chimeric PAP1 repressor. *Plant Biotechnol. J.* 2:  
495 487-493.
- 496 Misson J., Raghothama K.G., Jain A., Jouhet J., Block M.A., Bligny R. et al. (2005) A  
497 genome-wide transcriptional analysis using Arabidopsis thaliana Affymetrix gene chips  
498 determined plant responses to phosphate deprivation. *Proc. Natl. Acad. Sci. USA.* 102:  
499 11934-11939.
- 500 Mitsuda N., Seki M., Shinozaki K., Ohme-Takagi M. (2005) The NAC transcription factors

- 501 NST1 and NST2 of Arabidopsis regulate secondary wall thickenings and are required for  
502 anther dehiscence. *Plant Cell* 17: 2993-3006.
- 503 Nagarajan V.K., Jain A., Poling M.D., Lewis A.J., Raghothama K.G., Smith A.P. (2011)  
504 Arabidopsis Pht1;5 mobilizes phosphate between source and sink organs, and influences  
505 the interaction between phosphate homeostasis and ethylene signaling. *Plant Physiol.* 156:  
506 1149-1163.
- 507 Nakamura Y. (2013) Phosphate starvation and membrane lipid remodeling in seed plants.  
508 *Prog. Lipid Res.* 52: 43-50.
- 509 Niu Y.F. (2013) Responses of root architecture development to low phosphorus availability: a  
510 review. *Ann. Bot.* 112: 391-408.
- 511 Nussaume L., Kanno S., Javot H., Marin E., Pochon N., Ayadi A., et al. (2011) Phosphate  
512 Import in Plants: Focus on the PHT1 Transporters. *Front. Plant Sci.* 2: 83.
- 513 Oyama T., Shimura Y., Okada K. (1997) The *Arabidopsis* *HY5* gene encodes a bZIP protein  
514 that regulates stimulus-induced development of root and hypocotyl. *Genes Dev.* 11:  
515 2983-2995.
- 516 Péret B., Clément M., Nussaume L., Desnos T. (2011) Root developmental adaptation to  
517 phosphate starvation: better safe than sorry. *Trends Plant Sci.* 16: 442-450.
- 518 Pérez-Torres C.A., López-Bucio J., Cruz-Ramírez A., Ibarra-Laclette E., Dharmasiri S.,  
519 Estelle M. et al. (2008) Phosphate availability alters lateral root development in  
520 Arabidopsis by modulating auxin sensitivity via a mechanism involving the TIR1 auxin  
521 receptor. *Plant Cell* 20: 3258-3272.
- 522 Plaxton W.C., Tran H.T. (2011) Metabolic adaptations of phosphate-starved plants. *Plant*  
523 *Physiol.* 156: 1006-1015.
- 524 Poirier Y., Bucher M. (2002) Phosphate transport and homeostasis in Arabidopsis. In:  
525 Somerville CR, Meyerowitz, EM, editors. *The Arabidopsis Book* e0024.

- 526 Raghothama K.G. (2000) Phosphate transport and signaling. *Curr. Opin. Plant Biol.* 3:  
527 182-187.
- 528 Rose T.J., Liu L., Wissuwa M. (2013) Improving phosphorus efficiency in cereal crops: Is  
529 breeding for reduced grain phosphorus concentration part of the solution? *Front. Plant Sci.*  
530 4: 444.
- 531 Rubio V., Linhares F., Solano R., Martín A.C., Iglesias J., Leyva A. et al. (2001) A conserved  
532 MYB transcription factor involved in phosphate starvation signaling both in vascular plants  
533 and in unicellular algae. *Genes Dev.* 15: 2122-2133.
- 534 Sato A., Miura K. (2011) Root architecture remodeling induced by phosphate starvation. *Plant*  
535 *Signal. Behav.* 6: 1122-1126.
- 536 Shin D.H., Choi M., Kim K., Bang G., Cho M., Choi S.B. et al. (2013) HY5 regulates  
537 anthocyanin biosynthesis by inducing the transcriptional activation of the MYB75/PAP1  
538 transcription factor in Arabidopsis. *FEBS Lett.* 587: 1543-1547.
- 539 Thibaud M.C., Arrighi J.F., Bayle V., Chiarenza S., Creff A., Bustos R., et al. (2010)  
540 Dissection of local and systemic transcriptional responses to phosphate starvation in  
541 Arabidopsis. *Plant J.* 64: 775-789.
- 542 Ticconi C.A., Abel S. (2004) Short on phosphate: plant surveillance and countermeasures.  
543 *Trends Plant Sci.* 9: 548-555.
- 544 Wissuwa M. (2003) How do plants achieve tolerance to phosphorus deficiency? Small causes  
545 with big effects. *Plant Physiol.* 133: 1947-1958.
- 546 Woo J., MacPherson C.R., Liu J., Wang H., Kiba T., Hannah M.A. et al. (2012) The response  
547 and recovery of the *Arabidopsis thaliana* transcriptome to phosphate starvation. *BMC Plant*  
548 *Biol.* 12: 62.
- 549 Wu P., Ma L., Hou X., Wang M., Wu Y., Liu F. et al. (2003) Phosphate starvation triggers  
550 distinct alterations of genome expression in Arabidopsis roots and leaves. *Plant Physiol.*

551 132: 1260-1271.

552 Yeh C.M., Ohme-Takagi M. (2015) Transcription factors involved in acid stress responses in  
553 plants. *Nucleus* 58: 191-197.

554 Yeh C.M., Ohme-Takagi M., Tsai W.C. (2017) Current understanding on the roles of ethylene  
555 in plant responses to phosphate deficiency. *Int. J. Plant Biol. Res.* 5: 1058.

556 Yu H., Luo N., Sun L., Liu D. (2012) HPS4/SABRE regulates plant responses to phosphate  
557 starvation through antagonistic interaction with ethylene signalling. *J. Exp. Bot.* 63:  
558 4527-4538.

559 Zhou J., Jiao F., Wu Z., Li Y., Wang X., He X. et al. (2008) *OsPHR2* is involved in  
560 phosphate-starvation signaling and excessive phosphate accumulation in shoots of plants.  
561 *Plant Physiol.* 146: 1673-1686.

562

563

564

565

566

567

568

569

570

571

572

573

574

575

576 **Figure legends**

577 **Figure 1. Primary root length and fresh weight of wild-type and mutant seedlings in**  
578 **response to Pi treatment.** (A) Wildtype (Col-0) and *hy5-215* seedlings grown in Pi-sufficient  
579 (625  $\mu$ M Pi) and Pi-deficient (10  $\mu$ M Pi) conditions. (B) Primary root (PR) lengths after  
580 growth on vertical plates for 10 days. (C) Seedling fresh weights after growth on horizontal  
581 plates for 14 days. Data represent the means  $\pm$  standard error (SE) of four independent  
582 experiments. Different letters above the bars indicate statistically significant differences  
583 among the means based on ANOVA (Analysis of Variance) followed by Fisher's LSD (Least  
584 Significant Difference) tests ( $P < 0.05$ ).

585

586 **Figure 2. Root hair formation and root architecture of wild-type and mutant seedlings in**  
587 **response to Pi treatment.** (A) Root hair formation of Col-0 and *hy5-215* after growth of 7  
588 days. (B) Root architecture of Col-0 and *hy5-215* after growth of 10 days. (C) Increase of LR  
589 number in *hy5-215* plants. (D) Increase of LR length in *hy5-215* plants. (E) PR length in  
590 Col-0, *hy5-215*, *slr*, and *hy5-215slr-1*. All the seedlings were grown on 1/2 MS medium with  
591 625 or 10  $\mu$ M Pi for 7 to 10 days. Data represent means  $\pm$  SE of four independent experiments.  
592 Different letters above the bars indicate statistically significant differences among the means  
593 based on ANOVA followed by Fisher's LSD tests ( $P < 0.05$ ).

594

595 **Figure 3. Pi content in wild-type and mutant seedlings in response to Pi treatment.** (A)  
596 Shoot Pi content in Col-0 and *hy5-215*. (B) Root Pi content in Col-0 and *hy5-215*. (C) PR  
597 length in Col-0 and *hy5-215* when Pi was sufficient or absent. The seedlings were grown on  
598 1/2 MS medium with 625, 10 or 0  $\mu$ M Pi for 10 days. Data represent means  $\pm$  SE of four  
599 independent experiments. Different letters above the bars indicate statistically significant  
600 differences among the means based on ANOVA followed by Fisher's LSD tests ( $P < 0.05$ ).



601

602 **Figure 4. Effect of light on Pi-deficiency tolerance in Arabidopsis.** The seedlings were  
603 grown on 1/2 MS media with 625 or 10  $\mu$ M Pi under continuous light (A) or dark (B)  
604 treatments. The PR length was measured after 10 days of growth. Data represent means  $\pm$  SE  
605 of four independent experiments. Different letters above the bars indicate statistically  
606 significant differences among the means based on ANOVA followed by Fisher's LSD test ( $P$   
607  $<0.05$ ).

608

609 **Figure 5. Effect of light quality on primary root length in Arabidopsis.** The seedlings  
610 were grown on 1/2 MS media with 625 or 10  $\mu$ M Pi under continuous blue (B), red (R) or far  
611 red (FR) light treatments, respectively (A-D). The blue light receptor mutants, *cry1 cry2* (E)  
612 and *phot1 phot2* (F), were grown on Pi-sufficient and Pi-deficient media under long-day  
613 condition (16 h light/8 h dark). PR length was measured after 10 days of growth. Data  
614 represent means  $\pm$  SE of four independent experiments. Different letters above the bars  
615 indicate statistically significant differences among the means based on ANOVA followed by  
616 Fisher's LSD test ( $P <0.05$ ).

617

A

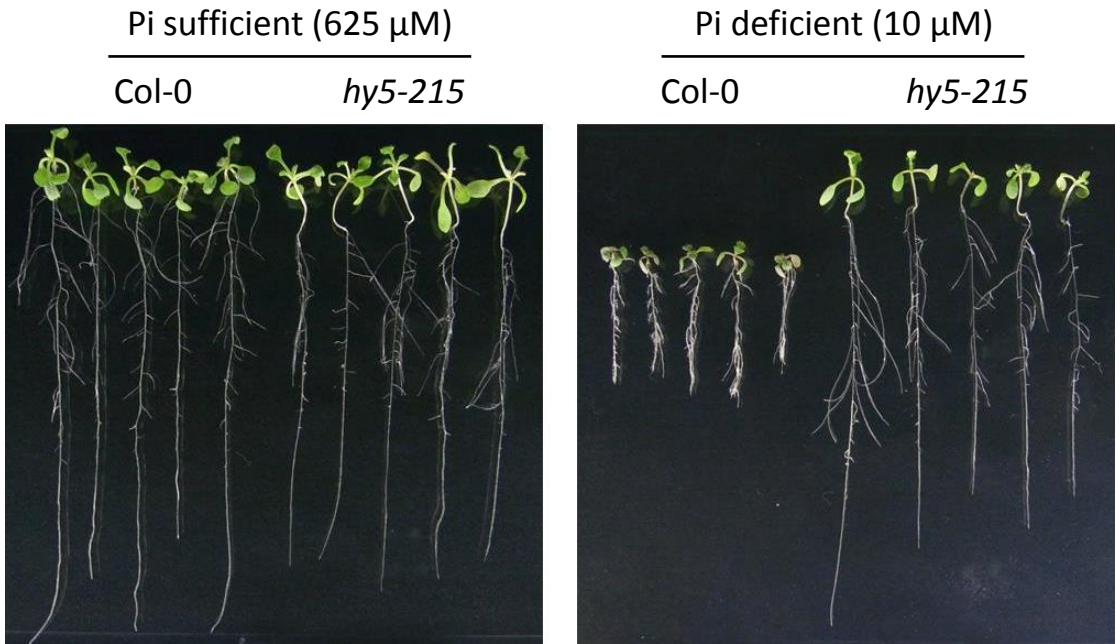

B

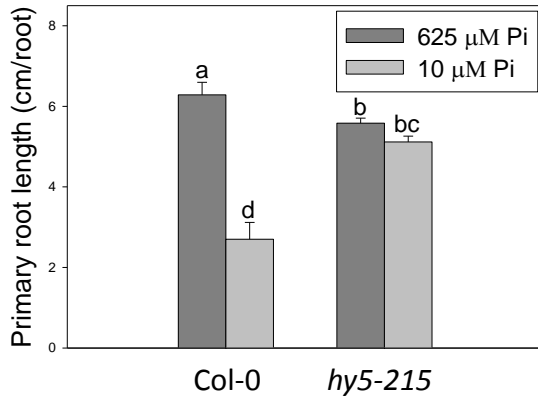

C

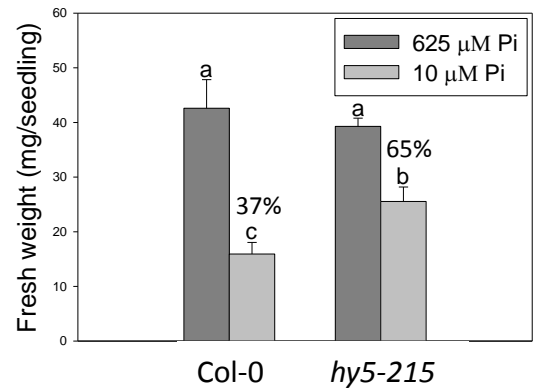

Fig. 1

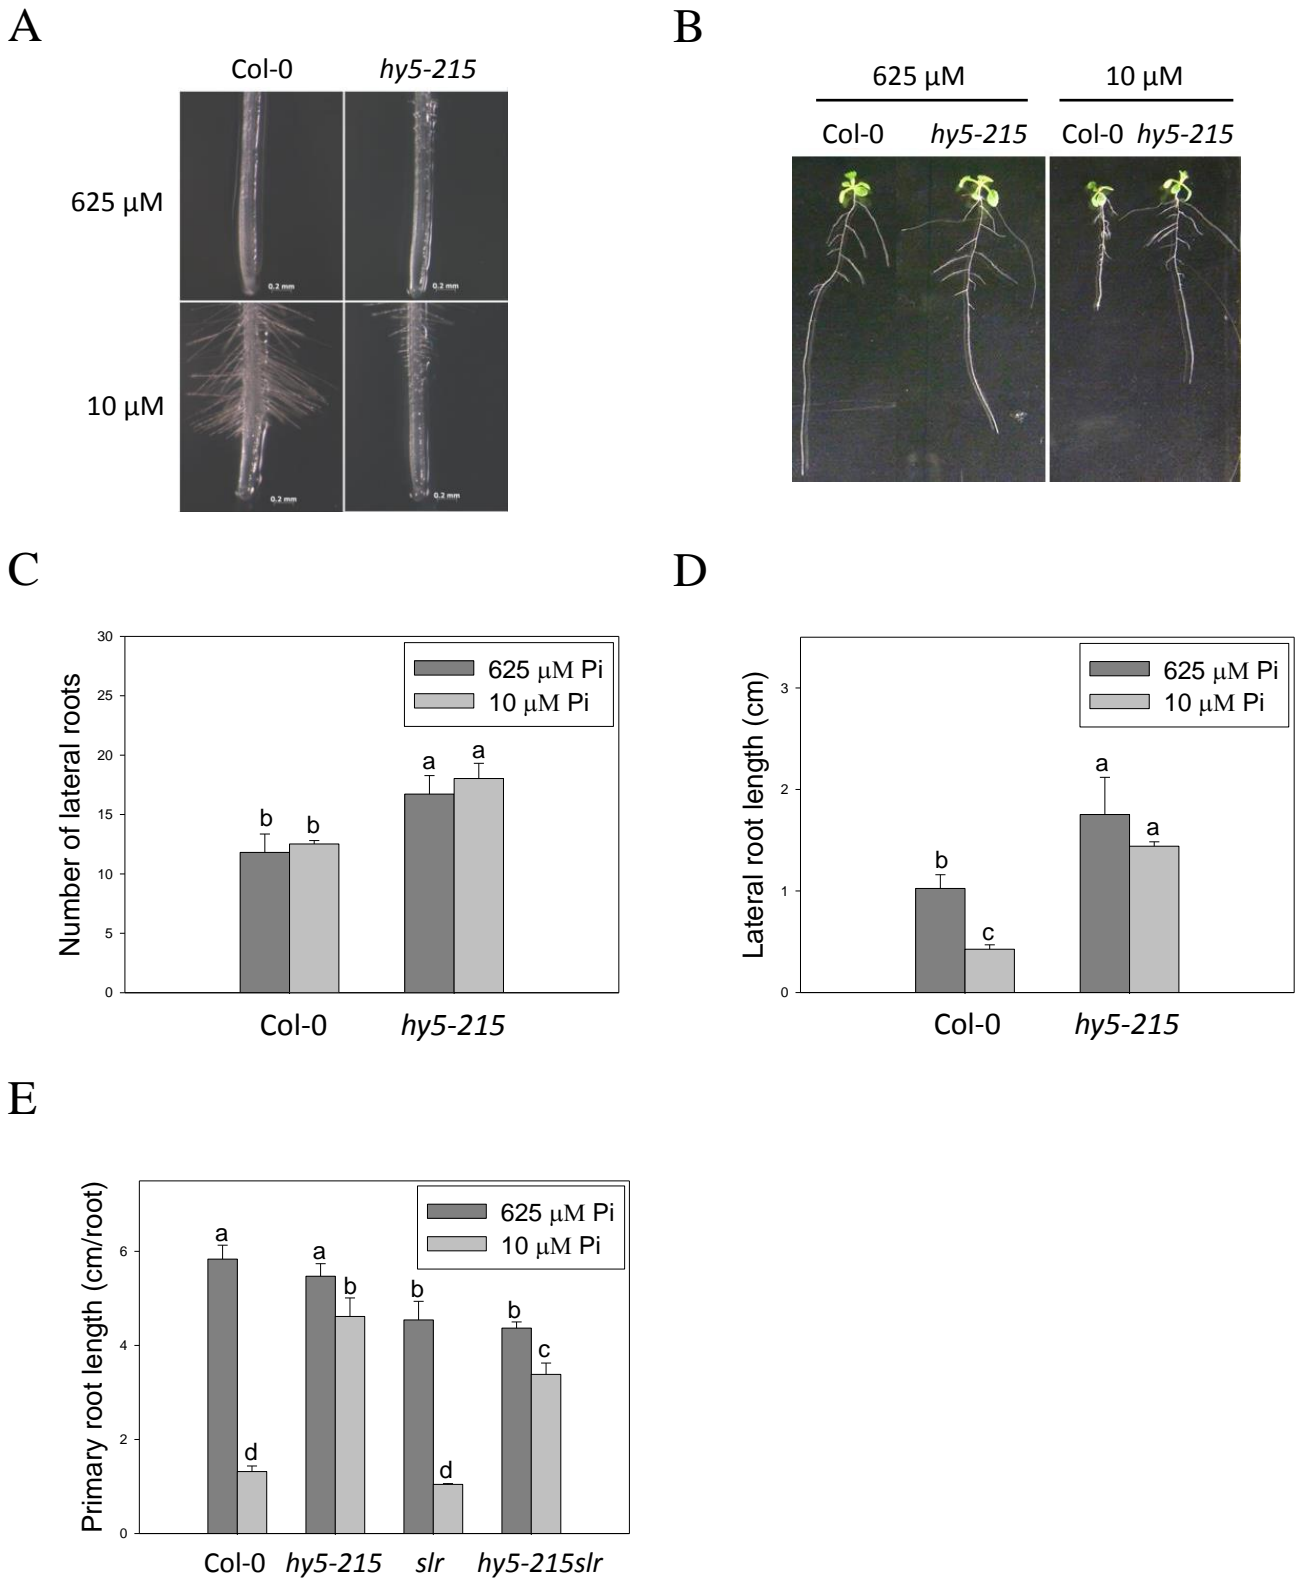

Fig. 2

**A**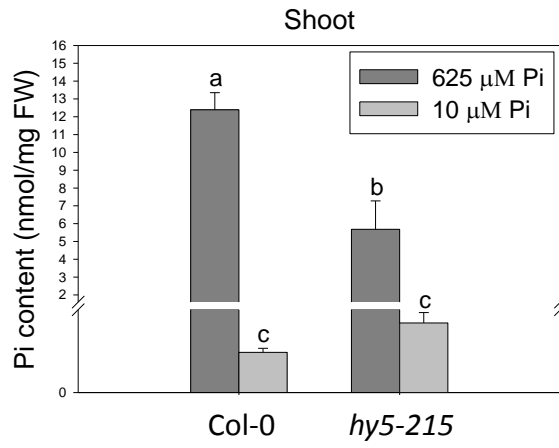**B**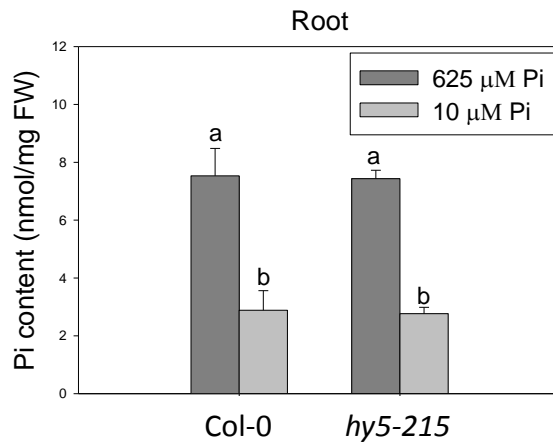**C**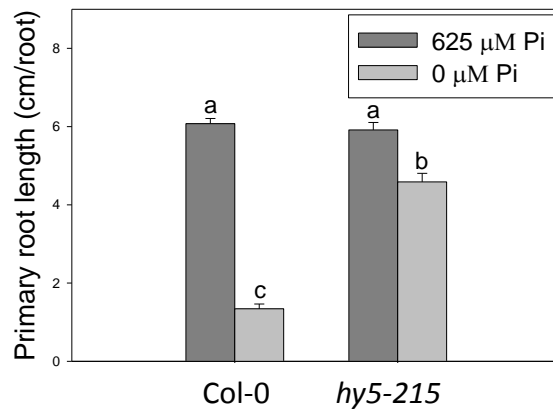**Fig. 3**

**A**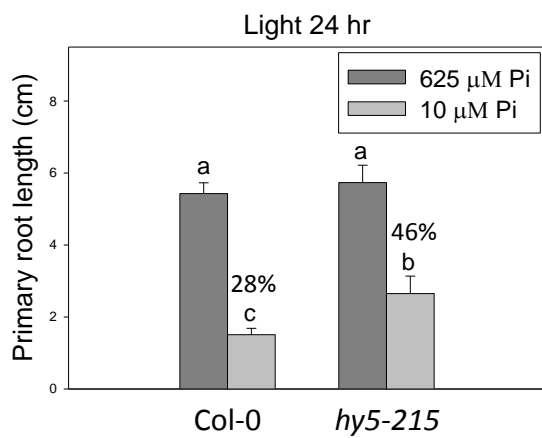**B**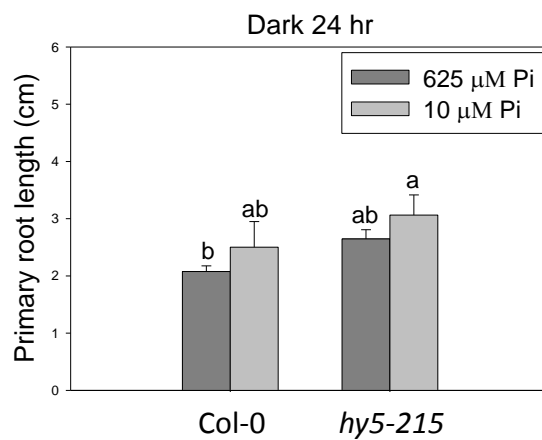**Fig. 4**

A

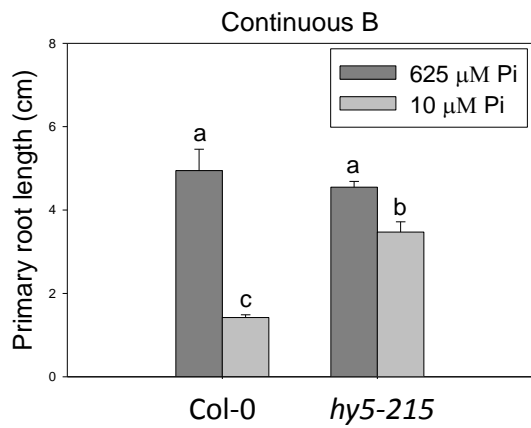

B

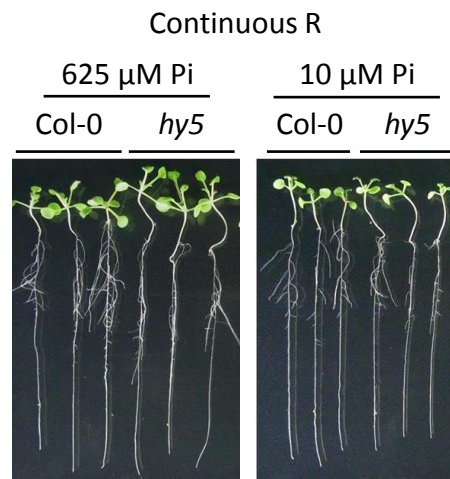

C

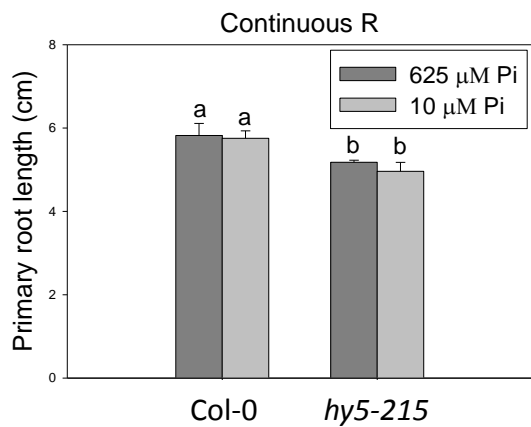

D

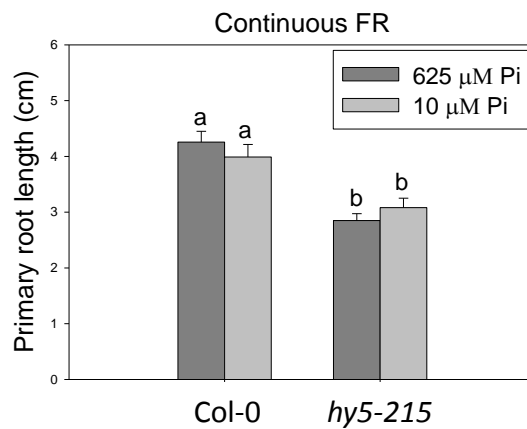

E

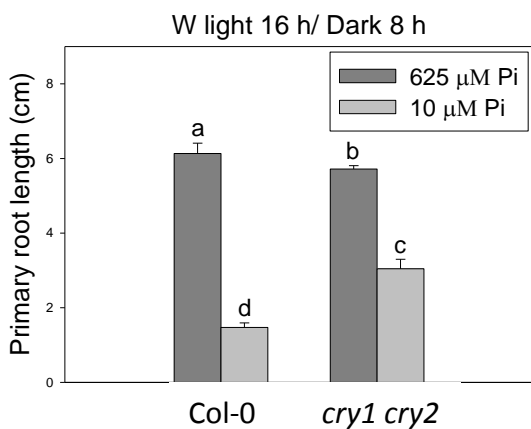

F

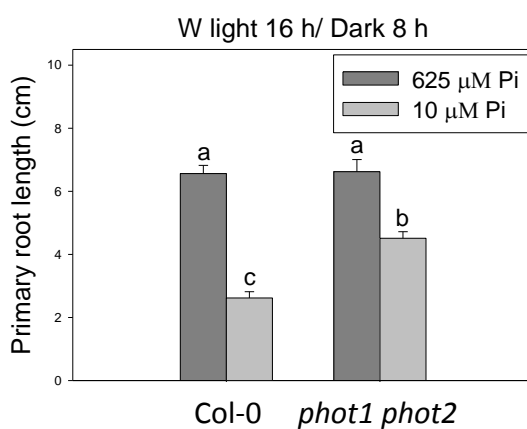

Fig. 5
